# Supplementary material for: Understanding the synergistic influence of the propylammonium bromide additive and erbium-doped CsPbI2Br for highly stable inorganic perovskite solar cells
Source: Royal Society of Chemistry journal article supplement (doi:10.1039/d2qi02448a), 2023-01-01
Supplement: d2qi02448a1.pdf [file d2qi02448a1.pdf]

## Supporting Information

### Understanding the Synergistic Influence of Propylammonium Bromide Additive and Erbium Doped CsPbI<sub>2</sub>Br for Highly Stable Inorganic Perovskite Solar Cells

*Jyoti V. Patil,<sup>a, b</sup> Sawanta S. Mali,<sup>b</sup> Shivaji B. Sadale,<sup>c</sup> Chang Kook Hong<sup>a, b\*</sup>*

*<sup>a</sup>Optoelectronic Convergence Research Center, School of Chemical Engineering, Chonnam National University, Gwangju, South Korea 61186.*

*<sup>b</sup>Polymer Energy Materials Laboratory, School of Chemical Engineering, Chonnam National University, Gwangju, South Korea 61186.*

*<sup>c</sup>Department of Technology, Shivaji University, Kolhapur, 416004, Maharashtra, India*

**\*Corresponding author:** hongck@chonnam.ac.kr

**S1: Details of different chemicals:**

The chemical materials including cesium iodide (CsI) (Sigma, 99.999 %), lead bromide (PbBr<sub>2</sub>) (Sigma, ≥ 98%), lead iodide (PbI<sub>2</sub>) (Sigma, 99%), erbium (III) chloride (ErCl<sub>3</sub>) (Sigma, 99.99%), *n*-Propylammonium bromide (PABr) (Sigma, 99.99%), dimethyl sulfoxide (DMSO), (N, N-dimethylformamide (DMF), poly(3-hexylthiophene-2,5-diyl) (P3HT) (Sigma-Aldrich, average Mw 50,000-100,000) were purchased from Sigma-Aldrich. The hot-air gun (BOSCH, GHG 630 DCE Hot Air Gun -0601 94C 740) was used as a hot-air source.

**S2: Details of different characterization of perovskite material and IPVSC-based devices:**

The surface morphological images were recorded by a scanning electron microscope (SEM; S-4700, Hitachi). The X-ray diffraction (XRD) measurements were carried out using a D/MAX Ultima III-XRD spectrometer (PAN analysis, Japan) with Cu K $\alpha$  line of 1.5410 Å. Optical absorption measurements were carried out on a UV-vis spectrophotometer (Varian, CARY, 300 Conc.) in the 500-900 nm wavelength range. Energy-dispersive X-ray (EDX) elemental mapping was carried out in the scanning transmission electron microscopy (STEM) mode. The contrast against the background of HAADF-STEM image has been carried out background selection: Rois mode at detector angle: 14.6 degree. The elemental information was studied using an X-ray photoelectron spectroscopy (XPS) (VG Multilab 2000-Thermo Scientific, USA, K-Alpha) with a multi-channel detector, which can endure high photonic energies from 0.1 to 3 keV. The ultraviolet-photoelectron spectroscopy (UPS) measurements were carried out using Thermo VG Scientific Sigma Probe, UK, UV Monochromatic He I (21.22 eV) gas, (Bias -5.0 V, Aperture size 8 mm adjustable) for UPS base UHV pressure 1 x 10<sup>-9</sup> mB without surface treatment. The spectral response was taken by a spectral IPCE measurements system (K3100, Mc-Science), which was equipped with a monochromator, a K240×E 300 lamp source connected with K401 OLS XE300W lamp power supply and a K102 signal amplifier. Prior to the use of the light intensity were calibrated using a Si-photodiode (Model: S1337-1010BQ) and In GaAs photodiode (model: G12180-050A) for 300-1100 nm and 1100-1400 nm calibration respectively. Measurements were taken in EQE mode. Time-resolved photoluminescence (TRPL) decay transients were measured at 650 nm using excitation with a 470 nm light pulse at a frequency of 5MHz from the Spectrophotometer F-7000.

The IPVSCs were illuminated using a solar simulator at AM 1.5 G for 10 s, where the light intensity was adjusted with an NREL-calibrated Si solar cell with a KG-5 filter to 1 sun intensity

(100 mW cm<sup>-2</sup>). The photovoltaic performance of IPVSC devices were measured by metal shadow masks with active small area of 0.3 x 0.3 = 0.09 cm<sup>2</sup>. The exact illumination to the active area was fixed via attaching thin metal shadow mask from back side throughout measurements. The *J-V* curves were measured along with the reverse scan direction from 1.5 V to - 0.05 V or the forward scan direction from -0.05 V to 1.5 V. Using the Mott–Gurney law, the trap density of the electron-only device with an architecture of FTO/mp-TiO<sub>2</sub>/perovskite/PCBM/Ag was measured with the space charge limited current (SCLC) model from 0 to 7 V under dark conditions. The Nyquist plots were obtained via conducting electrochemical impedance spectroscopy (EIS) analysis with the help of Iviumstat (Ivium Technologies B.V., Eindhoven, and the Netherlands) at an open-circuit potential at frequencies ranging from 10<sup>-1</sup> to 10<sup>5</sup> Hz with AC amplitude of 10 mV. For equivalent circuit analysis, Z-view 2.8d was used. The steady-state efficiencies were obtained by tracking the maximum power point. The IPVSC devices were illuminated using a solar simulator at AM 1.5 G for 10 s, where the light intensity was adjusted with an NREL-calibrated Si solar cell with a KG-5 filter to 1 sun intensity (100 mW cm<sup>-2</sup>). The device stability was tested in an air at 65 °C without encapsulation and after measurement devices were stored in ambient conditions. The *J-V* curves were periodically measured under AM1.5 G simulated sunlight at room temperature. For thermal stability, perovskite devices were kept on the hot plate at 65 °C and taken out during measurements. We monitored devices temperature ~ 20 °C by continuous air-steam flow and relative humidity was ~ 30 % for continuous illumination testing.

**Figure S1:** (a) The Cs, CsEr and CsEr-PA perovskite thin films deposited by the hot air flow method and (b) time dependent photographs of the Cs, CsEr and CsEr-PA-based perovskite thin films.

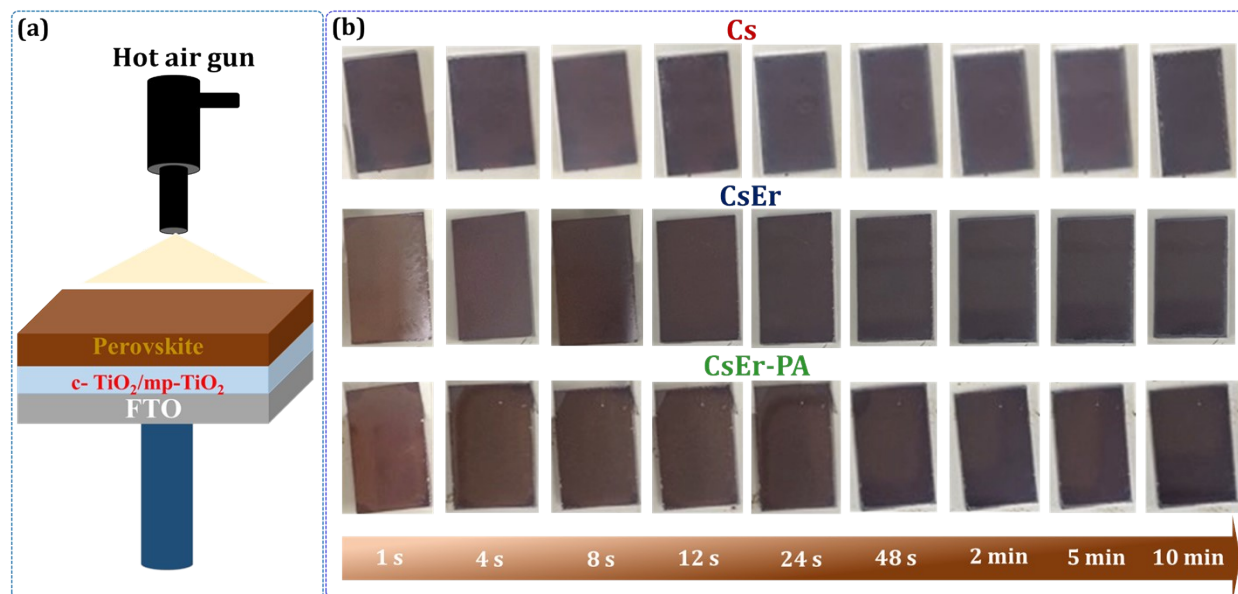

**Figure S2:** SEM images: (a) CsPbI<sub>2</sub>Br, (b) Cs-1 mg ml<sup>-1</sup> PABr, (c) Cs-2 mg ml<sup>-1</sup> PABr, (d) Cs-3 mg ml<sup>-1</sup> PABr and (e) Cross section of Cs-2 mg ml<sup>-1</sup> PABr-based IPVSC.

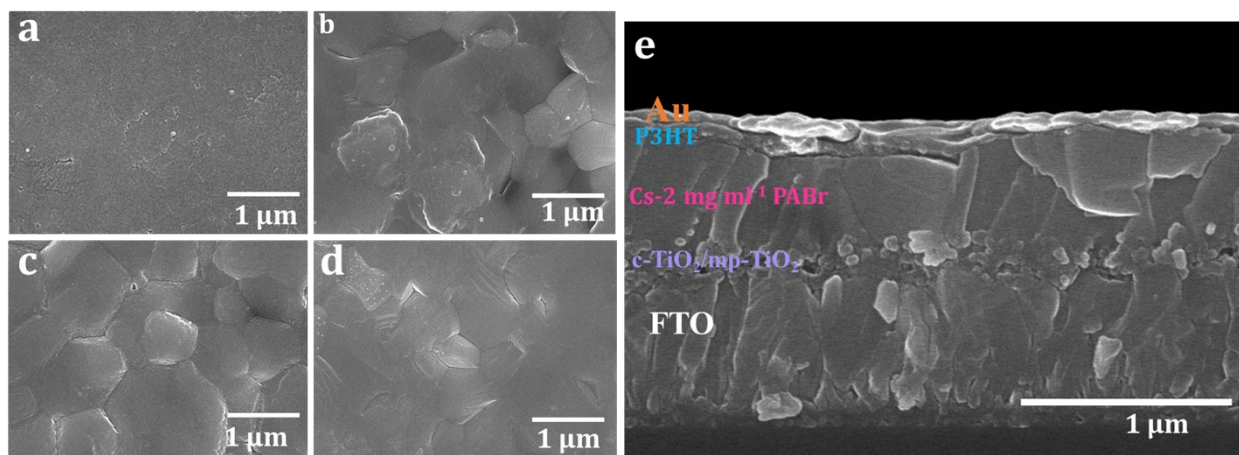

**Figure S3: Scanning electron microscopic images:** (a)  $\text{CsPb}_{0.99}\text{Er}_{0.01}\text{I}_2\text{BrCl}_{0.03}$ , (b)  $\text{CsPb}_{0.98}\text{Er}_{0.02}\text{I}_2\text{BrCl}_{0.06}$ , (c)  $\text{CsPb}_{0.97}\text{Er}_{0.03}\text{I}_2\text{BrCl}_{0.09}$ , (d)  $\text{CsPb}_{0.96}\text{Er}_{0.04}\text{I}_2\text{BrCl}_{0.12}$  perovskite films.

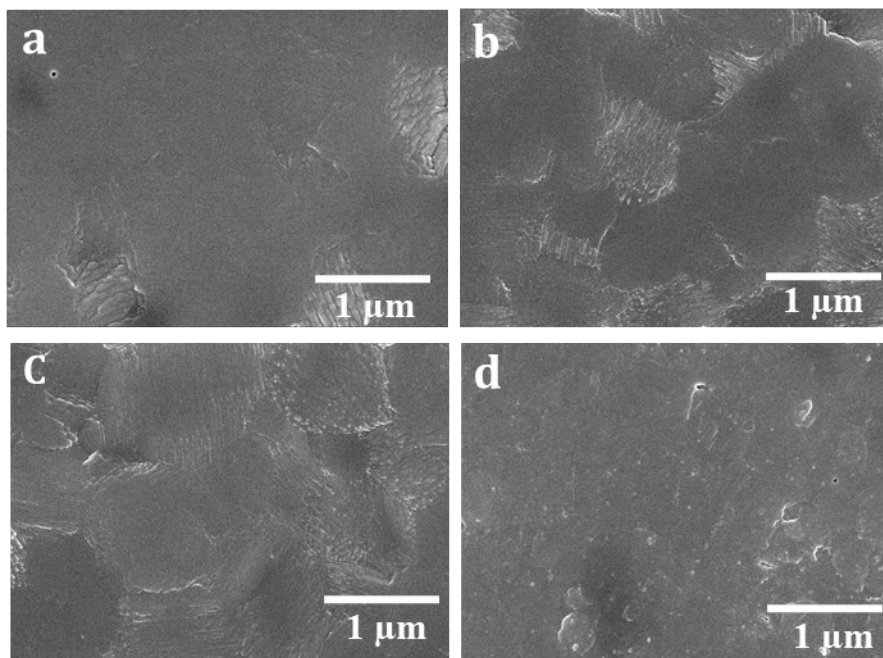

**Figure S4: Scanning electron microscopic images:** (a) CsEr-1mg ml<sup>-1</sup> PABr, (b) CsEr-2mg ml<sup>-1</sup> PABr, (c) CsEr-3mg ml<sup>-1</sup> PABr and (d) CsEr-4mg ml<sup>-1</sup> PABr-based perovskite thin films.

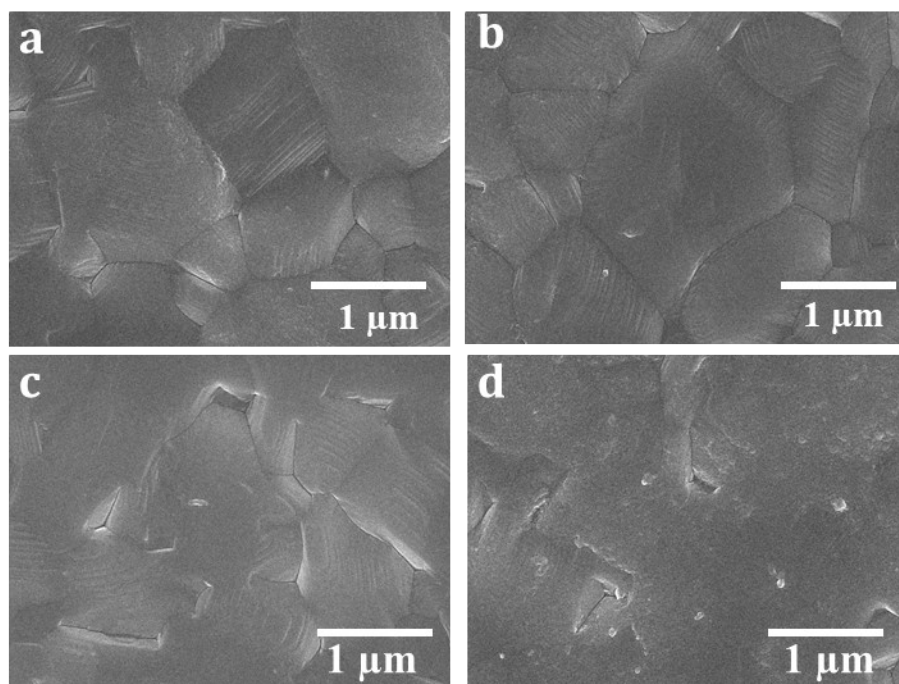

**Figure S5:** Elemental mapping: (a) HAADF STEM image, (b) cesium, (c) lead, (d) iodide, (e) bromide, (f) erbium and (g) chloride.

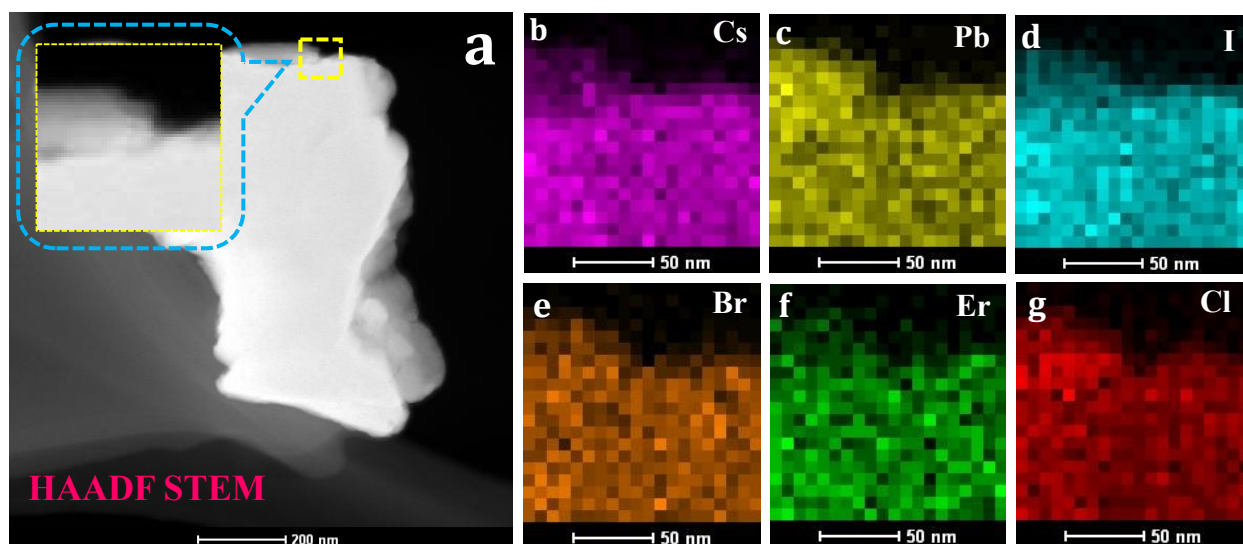



**Figure S6:** (a) Cross-sectional SEM image and (b) elemental mapping of  $\text{ErCl}_3$  doped  $\text{CsPbI}_2\text{Br}$ -based perovskite layer.

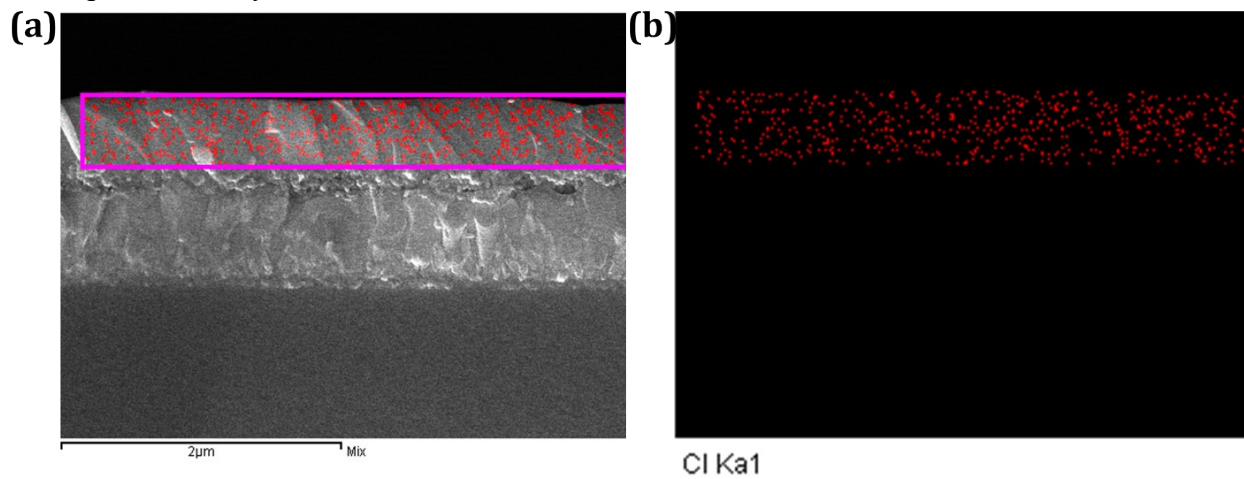

**Figure S7:** Magnified X-ray diffraction (XRD) patterns ( $2\theta=12-18$ ) of Cs, CsEr and CsEr-PA perovskite films.

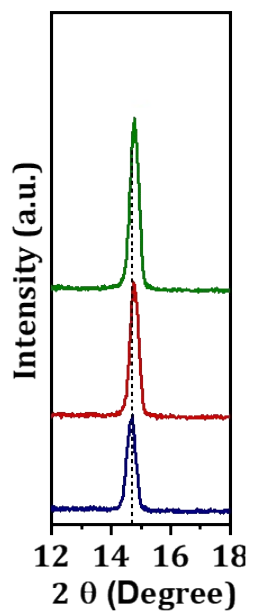

**Figure S8:** Tauc plots of the Cs, CsEr and CsEr-PA perovskite thin films calculated from the UV-Vis absorption spectra.

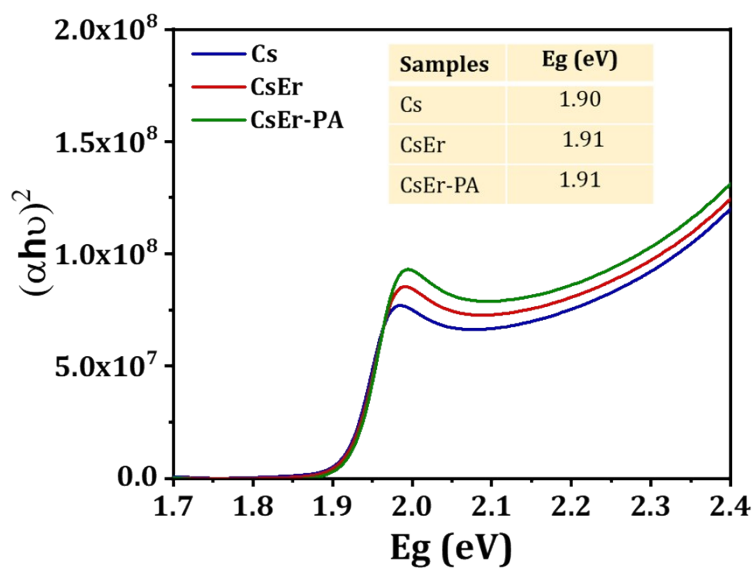

**Figure S9:** (a) UPS survey spectra of perovskite films, valence band region of the (b) Cs, (c) CsEr and (d) CsE-PA perovskites on the mp-TiO<sub>2</sub>/FTO substrate.

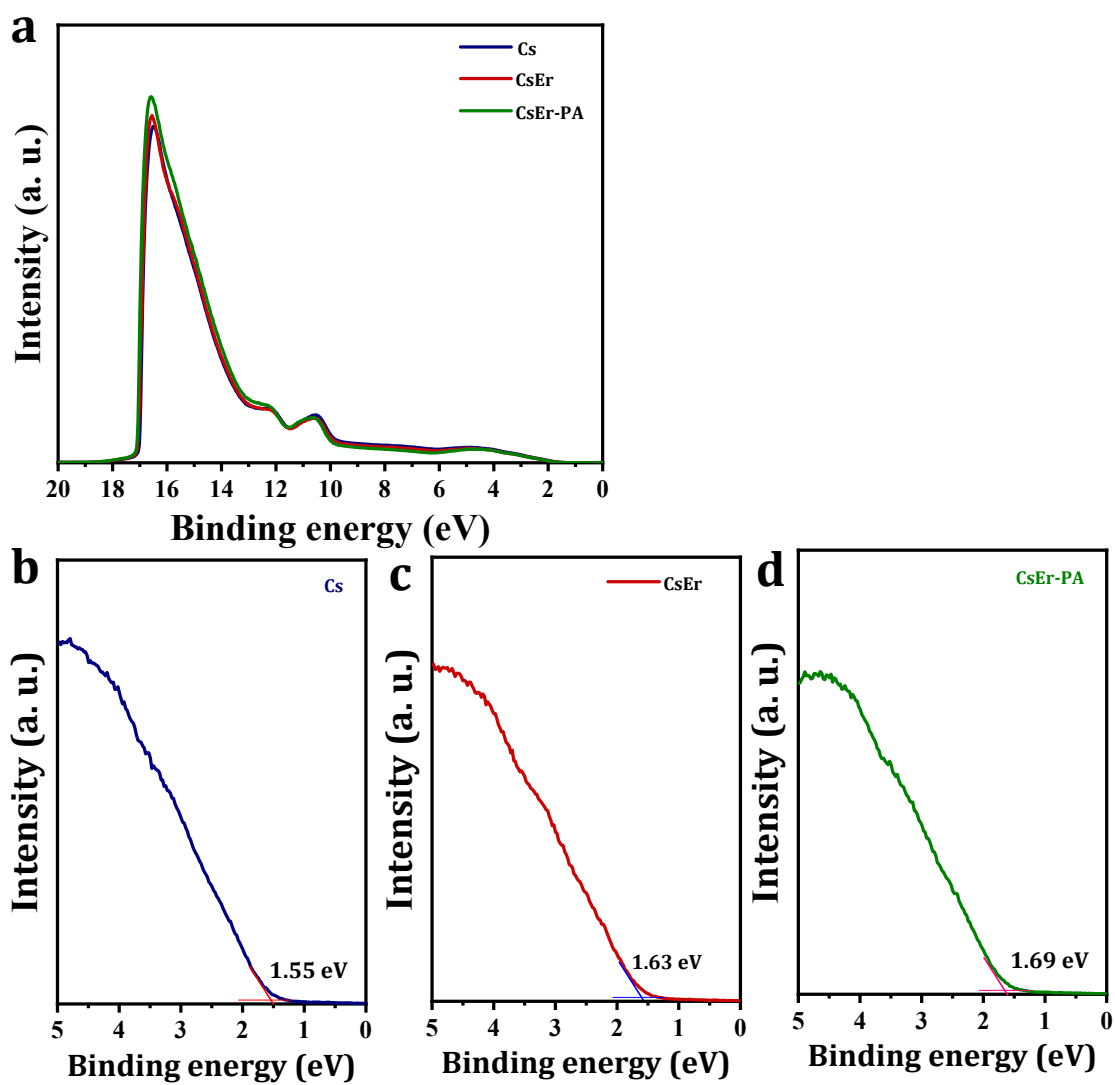

**Figure S10:**  $J$ - $V$  curve of the different amounts of the PABr (1 - 3 mg ml<sup>-1</sup>) additive added CsPbI<sub>2</sub>Br perovskites-based IPVSC devices.

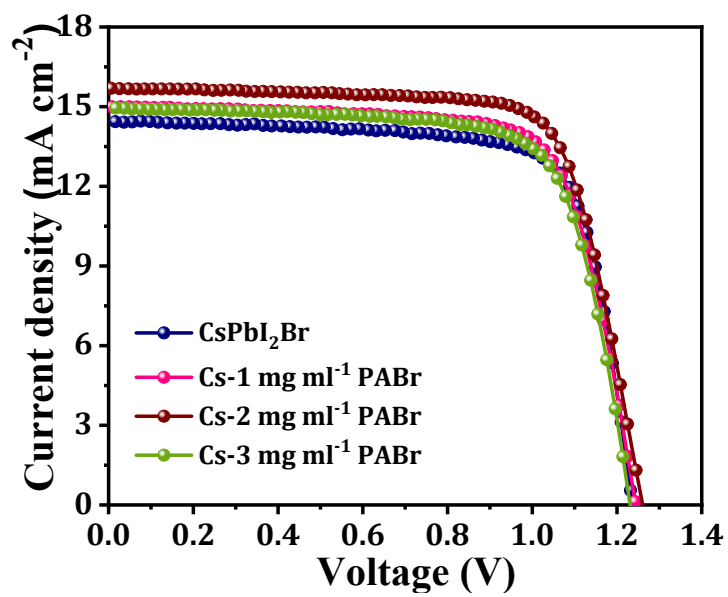

**Figure S11:**  $J$ - $V$  curves of the  $\text{CsPb}_{0.99}\text{Er}_{0.01}\text{I}_2\text{BrCl}_{0.03}$ ,  $\text{CsPb}_{0.98}\text{Er}_{0.02}\text{I}_2\text{BrCl}_{0.06}$ ,  $\text{CsPb}_{0.97}\text{Er}_{0.03}\text{I}_2\text{BrCl}_{0.09}$ ,  $\text{CsPb}_{0.96}\text{Er}_{0.04}\text{I}_2\text{BrCl}_{0.12}$  perovskites-based IPVSC devices.

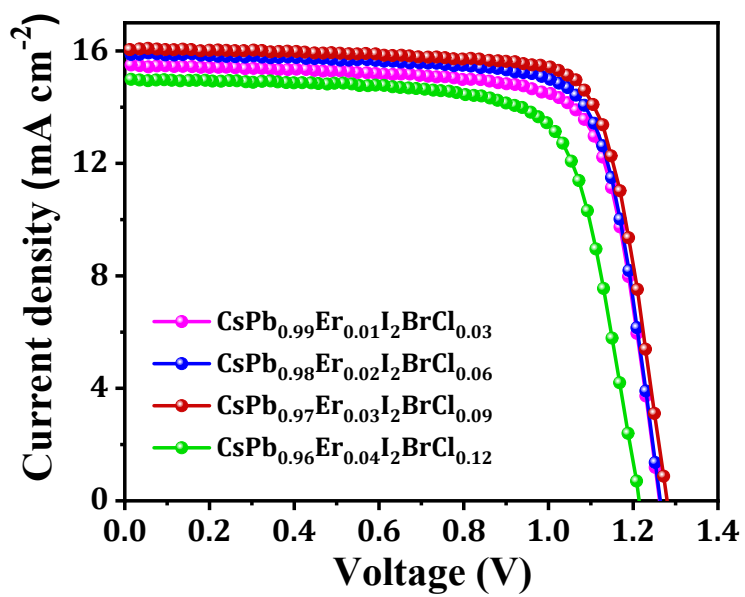

**Figure S12:**  $J$ - $V$  curves of the CsEr-1 mg ml<sup>-1</sup> PABr, CsEr-2 mg ml<sup>-1</sup> PABr, CsEr-3 mg ml<sup>-1</sup> PABr and CsEr-4 mg ml<sup>-1</sup> PABr perovskites-based IPVSC devices.

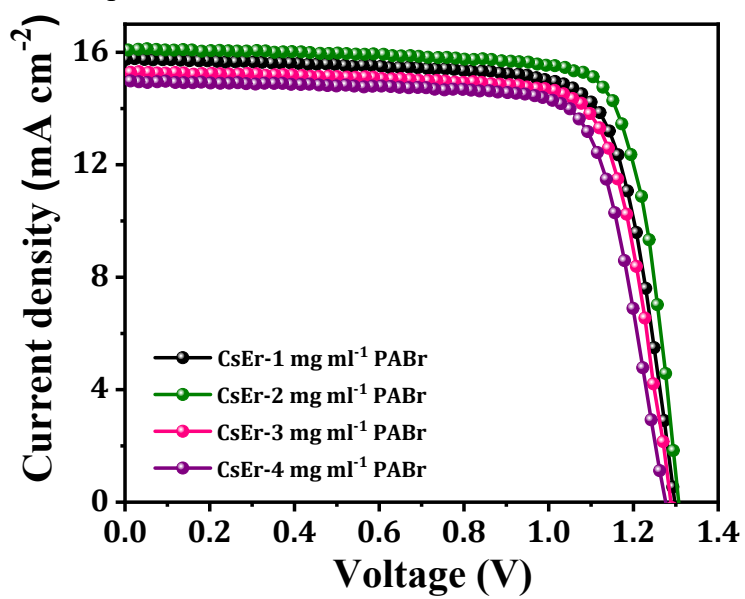

**Table S1:** XPS core-level peak positions of the Cs, CsEr and CsEr-PA-based perovskite thin films.

| Core level | CsPbI <sub>2</sub> Br |               |        | CsEr     |               |        | CsEr-PA  |               |        |
|------------|-----------------------|---------------|--------|----------|---------------|--------|----------|---------------|--------|
|            | Start BE              | Peak BE       | End BE | Start BE | Peak BE       | End BE | Start BE | Peak BE       | End BE |
| Cs3d5      | 728.03                | <b>724.46</b> | 719.97 | 731.23   | <b>724.56</b> | 719.31 | 728.45   | <b>724.64</b> | 720.24 |
| Cs3d3      | 741.89                | <b>738.41</b> | 734.89 | 744.01   | <b>738.5</b>  | 732.94 | 742.32   | <b>738.61</b> | 735.33 |
| Pb4f7      | 139.99                | <b>137.81</b> | 134.39 | 139.99   | <b>137.81</b> | 134.39 | 140.64   | <b>138.06</b> | 134.45 |
| Pb4f5      | 147.24                | <b>142.8</b>  | 139.99 | 147.24   | <b>142.8</b>  | 139.99 | 147.45   | <b>143.04</b> | 140.64 |
| I3d5       | 623.2                 | <b>618.88</b> | 613.58 | 623.07   | <b>618.95</b> | 613.99 | 624.52   | <b>619.05</b> | 613.64 |
| I3d3       | 633.95                | <b>630.35</b> | 625.8  | 634.55   | <b>630.42</b> | 626.06 | 635.16   | <b>630.53</b> | 626.03 |
| Br3d       | 71.16                 | <b>68.03</b>  | 63.8   | 71.57    | <b>68.35</b>  | 64.77  | 71.43    | <b>68.37</b>  | 64.81  |
| Er3d       | -                     | -             | -      | 174.19   | <b>169.45</b> | 167.15 | 174.93   | <b>169.86</b> | 166.76 |



**Table S2:** Different parameters calculated from the XRD of the Cs, CsEr and CsEr-PA-based perovskite thin films.

| Perovskites | Main peak position (°) | FWHM (main peak) | $d_{(100)}$ spacing (nm) | Lattice constant (nm) |
|-------------|------------------------|------------------|--------------------------|-----------------------|
| Cs          | 14.63                  | 0.180            | 0.6049                   | 0.6048                |
| CsEr        | 14.66                  | 0.324            | 0.6034                   | 0.6033                |
| CsEr-PA     | 14.67                  | 0.330            | 0.6032                   | 0.6031                |

**Table S3:** TRPL measurements of the Cs, CsEr and CsEr-PA-based perovskite thin films deposited on the mp-TiO<sub>2</sub>/FTO substrates.

| Perovskites films | $\tau_1$ (ns) | $\tau_2$ (ns) | $\tau_3$ (ns) | $A_1^*$ | $A_2^*$ | $A_3^*$ | $\langle\tau_{avg}\rangle$ (ns) |
|-------------------|---------------|---------------|---------------|---------|---------|---------|---------------------------------|
| Cs                | 17            | 3.2           | 0.901         | 6.5     | 3.4     | 0.98    | 4.19                            |
| CsEr              | 41            | 7.6           | 1.6           | 7.5     | 2.3     | 0.149   | 11                              |
| CsEr-PA           | 103           | 11            | 2             | 5.7     | 3.6     | 0.1266  | 30                              |

**Table S4:** Calculated parameters for energy level of the Cs, CsEr and CsEr-PA-based perovskite films from UPS spectra.

| Perovskites | $E_{\text{cutoff}}$ (eV) | WF (eV) | $E_{\text{onset}}$ (eV) | VBM (eV) | $\Delta E_g$ (eV) | CBM (eV) |
|-------------|--------------------------|---------|-------------------------|----------|-------------------|----------|
| Cs          | 17.03                    | 4.19    | 1.30                    | 5.49     | 1.90              | 3.59     |
| CsEr        | 17.07                    | 4.15    | 1.31                    | 5.46     | 1.91              | 3.55     |
| CsEr-PA     | 17.11                    | 4.11    | 1.33                    | 5.44     | 1.91              | 3.53     |

$WF = 21.22 - E_{\text{cutoff}}$ ,  $VBM = WF + E_{\text{onset}}$ ,  $CBM = VBM - E_g$

**Table S5:**  $J-V$  analysis of the CsPbI<sub>2</sub>Br, Cs-1 mg ml<sup>-1</sup> PABr, Cs-2 mg ml<sup>-1</sup> PABr and Cs-3 mg ml<sup>-1</sup> PABr perovskites-based IPVSC devices.

| Perovskites                   | $V_{\text{OC}}$ (V) | $J_{\text{SC}}$ (mA cm <sup>-2</sup> ) | FF (%) | PCE (%) |
|-------------------------------|---------------------|----------------------------------------|--------|---------|
| CsPbI <sub>2</sub> Br         | 1.235               | 14.45                                  | 74.18  | 13.20   |
| Cs-1 mg ml <sup>-1</sup> PABr | 1.241               | 15.08                                  | 74.24  | 13.89   |
| Cs-2 mg ml <sup>-1</sup> PABr | 1.261               | 15.69                                  | 74.42  | 14.72   |
| Cs-3 mg ml <sup>-1</sup> PABr | 1.228               | 14.97                                  | 73.49  | 13.50   |

**Table S6:**  $J$ - $V$  analysis of the CsPb<sub>0.99</sub>Er<sub>0.01</sub>I<sub>2</sub>BrCl<sub>0.03</sub>, CsPb<sub>0.98</sub>Er<sub>0.02</sub>I<sub>2</sub>BrCl<sub>0.06</sub>, CsPb<sub>0.97</sub>Er<sub>0.03</sub>I<sub>2</sub>BrCl<sub>0.09</sub> and CsPb<sub>0.96</sub>Er<sub>0.04</sub>I<sub>2</sub>BrCl<sub>0.12</sub> perovskites-based IPVSC devices.

| Perovskites                                                                 | V <sub>OC</sub> (V) | J <sub>SC</sub> (mA cm <sup>-2</sup> ) | FF (%) | PCE (%) |
|-----------------------------------------------------------------------------|---------------------|----------------------------------------|--------|---------|
| CsPb <sub>0.99</sub> Er <sub>0.01</sub> I <sub>2</sub> BrCl <sub>0.03</sub> | 1.260               | 15.49                                  | 75.58  | 14.75   |
| CsPb <sub>0.98</sub> Er <sub>0.02</sub> I <sub>2</sub> BrCl <sub>0.06</sub> | 1.262               | 15.89                                  | 76.00  | 15.24   |
| CsPb <sub>0.97</sub> Er <sub>0.03</sub> I <sub>2</sub> BrCl <sub>0.09</sub> | 1.280               | 16.01                                  | 76.79  | 15.73   |
| CsPb <sub>0.96</sub> Er <sub>0.04</sub> I <sub>2</sub> BrCl <sub>0.12</sub> | 1.212               | 15.00                                  | 72     | 13.08   |

**Table S7:**  $J$ - $V$  analysis of the CsEr-1 mg ml<sup>-1</sup> PABr, CsEr-2 mg ml<sup>-1</sup> PABr, CsEr-3 mg ml<sup>-1</sup> PABr and CsEr-4 mg ml<sup>-1</sup> PABr perovskites-based IPVSC devices.

| Perovskites                     | V <sub>OC</sub> (V) | J <sub>SC</sub> (mA cm <sup>-2</sup> ) | FF (%) | PCE (%) |
|---------------------------------|---------------------|----------------------------------------|--------|---------|
| CsEr-1 mg ml <sup>-1</sup> PABr | 1.293               | 15.89                                  | 76.89  | 15.79   |
| CsEr-2 mg ml <sup>-1</sup> PABr | 1.304               | 16.16                                  | 79.44  | 16.74   |
| CsEr-3 mg ml <sup>-1</sup> PABr | 1.284               | 15.29                                  | 75.52  | 14.82   |
| CsEr-4 mg ml <sup>-1</sup> PABr | 1.274               | 14.96                                  | 74.65  | 14.22   |

**Table S8:** EIS fitting parameters of the Cs, CsEr and CsEr-PA-based IPVSC devices.

| Perovskites | R <sub>S</sub> (Ω) | R <sub>rec</sub> (Ω) |
|-------------|--------------------|----------------------|
| Cs          | 184.67             | 5337                 |
| CsEr        | 84.99              | 6544                 |
| CsEr-PA     | 45.59              | 7857                 |

**Table S9:** Photovoltaic parameters of the Cs, CsEr and CsEr-PA-based IPVSCs.

| Sr. no | CsPbI <sub>2</sub> Br                 |                     |        |              | CsEr                                  |                     |        |              | CsEr-PA                               |                     |        |              |
|--------|---------------------------------------|---------------------|--------|--------------|---------------------------------------|---------------------|--------|--------------|---------------------------------------|---------------------|--------|--------------|
|        | J <sub>sc</sub> (mAcm <sup>-2</sup> ) | V <sub>oc</sub> (V) | FF (%) | PCE (%)      | J <sub>sc</sub> (mAcm <sup>-2</sup> ) | V <sub>oc</sub> (V) | FF (%) | PCE (%)      | J <sub>sc</sub> (mAcm <sup>-2</sup> ) | V <sub>oc</sub> (V) | FF (%) | PCE (%)      |
| 1      | 1.105                                 | 12.10               | 67.50  | <b>9.02</b>  | 1.160                                 | 14.55               | 72.89  | <b>12.30</b> | 1.198                                 | 14.77               | 76     | <b>13.44</b> |
| 2      | 1.130                                 | 12.86               | 68     | <b>9.88</b>  | 1.163                                 | 14.58               | 72.95  | <b>12.36</b> | 1.205                                 | 14.88               | 76.35  | <b>13.68</b> |
| 3      | 1.135                                 | 12.95               | 68.52  | <b>10.07</b> | 1.166                                 | 14.60               | 73     | <b>12.42</b> | 1.210                                 | 14.93               | 76.42  | <b>13.80</b> |
| 4      | 1.143                                 | 13.0                | 68.85  | <b>10.23</b> | 1.176                                 | 14.70               | 73.25  | <b>12.69</b> | 1.215                                 | 15.05               | 76.58  | <b>14</b>    |
| 5      | 1.154                                 | 13.10               | 68.91  | <b>10.41</b> | 1.188                                 | 14.85               | 73.76  | <b>13.01</b> | 1.219                                 | 15.10               | 76.70  | <b>14.11</b> |
| 6      | 1.161                                 | 13.29               | 69     | <b>10.64</b> | 1.198                                 | 15                  | 74     | <b>13.29</b> | 1.230                                 | 15.25               | 76.86  | <b>14.41</b> |
| 7      | 1.172                                 | 13.48               | 69.35  | <b>10.95</b> | 1.200                                 | 15.02               | 74.45  | <b>13.41</b> | 1.245                                 | 15.35               | 77     | <b>14.71</b> |
| 8      | 1.185                                 | 13.95               | 69.49  | <b>11.44</b> | 1.210                                 | 15.15               | 75     | <b>13.74</b> | 1.253                                 | 15.40               | 77.35  | <b>14.92</b> |
| 9      | 1.191                                 | 14.00               | 70     | <b>11.67</b> | 1.221                                 | 15.23               | 75.88  | <b>14.11</b> | 1.265                                 | 15.45               | 77.40  | <b>15.12</b> |
| 10     | 1.199                                 | 14.05               | 70.85  | <b>11.93</b> | 1.237                                 | 15.52               | 76.22  | <b>14.63</b> | 1.277                                 | 15.56               | 77.56  | <b>15.41</b> |
| 11     | 1.209                                 | 14.09               | 71.20  | <b>12.12</b> | 1.245                                 | 15.66               | 76.41  | <b>14.89</b> | 1.284                                 | 15.71               | 78     | <b>15.83</b> |
| 12     | 1.222                                 | 14.15               | 72     | <b>12.44</b> | 1.258                                 | 15.75               | 76.72  | <b>15.35</b> | 1.286                                 | 15.88               | 78.45  | <b>16.02</b> |
| 13     | 1.228                                 | 14.36               | 73     | <b>12.87</b> | 1.268                                 | 15.81               | 76.84  | <b>15.20</b> | 1.292                                 | 16                  | 78.56  | <b>16.23</b> |
| 14     | 1.231                                 | 14.41               | 74     | <b>13.12</b> | 1.276                                 | 15.95               | 76.69  | <b>15.60</b> | 1.300                                 | 16.10               | 78.71  | <b>16.47</b> |
| 15     | 1.235                                 | 14.45               | 74.18  | <b>13.2</b>  | 1.280                                 | 16.01               | 76.79  | <b>15.73</b> | 1.304                                 | 16.16               | 79.44  | <b>16.74</b> |

❖ **TRPL measurement details**

The obtained TRPL lifetime parameters were well fitted with a tri-exponential decay function from equation S1 [S1].

$$I(t) = I_0 + A_1 \exp\left(-\frac{t-t_0}{\tau_1}\right) + A_2 \exp\left(-\frac{t-t_0}{\tau_2}\right) + A_3 \exp\left(-\frac{t-t_0}{\tau_3}\right) \quad \text{--- (S1)}$$

Where,  $\tau_1$ ,  $\tau_2$  and  $\tau_3$  are first, second and third-order decay time,  $A_1$ ,  $A_2$  and  $A_3$  are respective weight factors of each decay channel. Here,  $\tau_1$  stands for the fast decay lifetime and  $\tau_2$  and  $\tau_3$  stand for the slow decay function. The average lifetimes  $\langle \tau_{avg} \rangle$  of Cs, CsEr and CsEr-PA inorganic perovskite thin films were calculated from equation S2 [S1].

$$\langle \tau_{avg} \rangle = \frac{\sum_n A_n \tau_n^2}{\sum_m A_m \tau_m^2} \quad \text{--- (S2)}$$

❖  **$V_{OC}$  as a function of illumination intensity**

The ideality factor ( $\eta$ ) yielded by the slope of the fitted data, which was calculated by equations S3 and S4 [S2].

$$V_{OC} = nkT \ln(I)/q + A \quad \text{----- (S3)}$$

Where,  $k$  = Boltzmann constant,  $T$  = the temperature in Kelvin,  $q$  = the elementary charge and  $A$  is a constant according to the Shockley–Read–Hall (SRH) recombination mechanism [S3].

Equation S3 can be simplified for  $\eta$  as,

$$\eta = \text{slope} \times \frac{q}{kT} \quad \text{----- (S4)}$$

❖ **Charge Transport Studies (Trap density)**

The trap density ( $N_t$ ) of the Cs, CsEr and CsEr-PA perovskite devices can be calculated according to equation S5 via trap-filled limit voltage ( $V_{TFL}$ ) [S4, S5].

$$N_t = \frac{2\varepsilon_0\varepsilon V_{TFL}}{eL^2} \quad \text{----- (S5)}$$

(Where  $\varepsilon_0$  = permittivity of vacuum,  $\varepsilon$  = relative dielectric constant,  $e$  = elementary charge, and  $L$  = perovskite film thickness).

## References:

- [S1] S. S. Mali, J. V. Patil, H. J. Kim and C. K. Hong, Gallium cationic incorporated compact  $\text{TiO}_2$  as an efficient electron-transporting layer for stable perovskite solar cells, *Matter*, 2019, **1**, 464.
- [S2] C. G. Shuttle, B. O. Regan, A. M. Ballantyne, J. Nelson, D. D. Bradley and J. R. Durrant, Bimolecular recombination losses in polythiophene: fullerene solar cells, *Phys. Rev. B: Condens. Matter Mater. Phys.* 2008, **78**, 113201.
- [S3] H. Wang, J. H. Hsu, G. Yang, C. Yu, Novel organic schottky barrier diode created in a single planar polymer film, *Adv. Mater.* 2016, **28**, 9545–9549.
- [S4] H. Y. Park, D. C. Lim, K. D. Kim and S. Y. Jang, Performance optimization of low-temperature-annealed solution-processable ZnO buffer layers for inverted polymer solar cells, *J. Mater. Chem. A* 2013, **1**, 6327– 6334.
- [S5] J. Zhu, B. He, Z. Gong, Y. Ding, W. Zhang, X. Li, Z. Zong, H. Chen and Q. Tang, Grain enlargement and defect passivation with melamine additives for high efficiency and stable  $\text{CsPbBr}_3$  perovskite solar cells, *ChemSusChem*, 2020, **13**, 1834–1843.
